# Supplementary material for: CNV-P: a machine-learning framework for predicting high confident copy number variations
Source: PeerJ journal article supplement (doi:10.7717/peerj.12564), 2021-12-02
Supplement: Supplemental_Table_S1.xlsx [file Supplemental_Table_S1.xlsx]

## Sheet: Sheet1
Table S1 : Gold-standard CNVs data sets using by CNV-P
Data source	Datasets	Number of sample	Number of CNVs	Reference
Simulated datasets	Training set	chr1+chr2	2622	simulated by mason2+wgsim
	Test set	chr3+chr4	2172	simulated by mason2+wgsim
Real datasets	Training set	6	138846	ref1
	Test set	3
	Validate set 1	1	8908	ref2/ref3/ref4
	Validate set 2	1	11313	ref5
1. Chaisson, M. J. P. et al. Multi-platform discovery of haplotype-resolved structural variation in human genomes. Nat. Commun. 10, 1784 (2019)						oze;
2. Pendleton, M. et al. Assembly and diploid architecture of an individual human genome via single-molecule technologies. Nat. Methods 12, 780–786 (2015)
3. Sudmant, P. H. et al. An integrated map of structural variation in 2,504 human genomes. Nature 526, 75–81 (2015)
4. MacDonald JR, Ziman R, Yuen RK, Feuk L, Scherer SW. The database of genomic variants: a curated collection of structural variation in the human genome. Nucleic Acids Res. 2013 Oct 29. PubMed PMID: 24174537
5. Zook, J. M. et al. A robust benchmark for germline structural variant detection. bioRxiv https://doi.org/10.1101/664623 (2019)
