# Supplementary material for: CNV-P: a machine-learning framework for predicting high confident copy number variations
Source: PeerJ journal article supplement (doi:10.7717/peerj.12564), 2021-12-02
Supplement: Supplemental_Table_S2.xlsx [file Supplemental_Table_S2.xlsx]

## Sheet: Sheet1
Table S2: Data sets For CNV-P
	sample	platform	NCBI number	mean_insert_size	insert_size_sd	median_insert_size	insert_size_median_absolute_deviation	coverage
Training sample	NA19238	ILLUMINA	SRR7782690	395	58	400.408	94.3897	29.15
	NA19239	ILLUMINA	SRR7782691	400	58	405.098	93.5334	30.86
	NA19240	ILLUMINA	SRR7782669	375	53	377.791	86.4138	32.2
	HG00512	ILLUMINA	SRR7782672	369	52	372.131	85.0929	26.82
	HG00513	ILLUMINA	SRR7782673	391	56	395.343	91.1684	24.05
	HG00514	ILLUMINA	SRR7782674	388	55	392.345	89.0435	23.14
Test sample	HG00731	ILLUMINA	SRR7782675	372	52	373.877	84.9966	25.45
	HG00732	ILLUMINA	SRR7782676	383	54	386.884	87.7075	27.01
	HG00733	ILLUMINA	SRR7782677	373	53	375.015	87.3367	26
Validation sample	NA12878	ILLUMINA	SRR7782683	380	54	384.5	88.7523	24.47
	HG002	ILLUMINA	SRR1766564,SRR1766581,SRR1766600,SRR1766553,SRR1766554,SRR1766565,SRR1766578,SRR1766598	569	95	568.178	163.82	35.41
	NA12878	BGI-500	ERP017158	343	52	341.52	81.06	37.62
