# Supplementary material for: CNV-P: a machine-learning framework for predicting high confident copy number variations
Source: PeerJ journal article supplement (doi:10.7717/peerj.12564), 2021-12-02
Supplement: Supplemental_Table_S3.xlsx [file Supplemental_Table_S3.xlsx]

## Sheet: Sheet1
Table S3 : Traning features of CNV-P
Features	Description
Read depth	A log2 ratio of the mean read depth within a CNV to whole genome mean coverage
Read depth_l	Nomalized read depth within the area that 1kb to the CNV left
Read depth_r	Nomalized read depth within the area that 1kb to the CNV right
GC_cont	GC rate within a CNV
GC_cont_l	GC rate within the area that 1kb to the CNV left
GC_cont_r	GC rate within the area that 1kb to the CNV right
CNV type	CNV type(del=0;dup=1)
CNV size	The size of CNV
Qua_l	number of reads that mapping quality <10 within the area that 1kb to the CNV left
Qua_r	number of reads that mapping quality <10 within the area that 1kb to the CNV right
SR_l	number of split reads within the area that 1kb to the CNV left
SR_r	number of split reads within the area that 1kb to the CNV right
PEM_l	number of outlier pair (insert sizes outside of the median ± 3 × SD) within the area that 1kb to the CNV left
PEM_r	number of outlier pair (insert sizes outside of the median ± 3 × SD) within the area that 1kb to the CNV right
Pair_l	number of not paired reads within the area that 1kb to the CNV left
Pair_r	number of not paired reads within the area that 1kb to the CNV right
Note : 1. For Qua_l,Qua_r,SR_l,SR_r,PEM_l,PEM_r,Pair_l,Pair_r, we limited the search for +/-500bp of the start and end positions of the CNV, then normalized the number according to whole genome mean coverage
Read depth	CNV size
Read depth_l	CNV type
Read depth_r	Read depth
GC content	GC content
GC_l	Read depth_l
GC-r	GC_l
CNV type	Read depth_r
CNV size	GC-r
Qua_l	SR_l
Qua_r	Qua_l
SR_l	pair_l
SR_r	PEM_l
PEM_l	SR_r
PEM_r	Qua_r
pair_l	pair_r
pair_r	PEM_r
